# Supplementary material
Source: PubMed Central journal article supplement (PMC4023412)

SUPPLEMENTARY DATA

**Supplementary Table 1.** mRNA Expressions of Key Lipid Metabolism Genes in Human Skeletal Muscle Tissue and Myotubes.

| Skeletal Muscle Tissue |             |             |         |
|------------------------|-------------|-------------|---------|
| Gene                   | Control     | T2D         | p-value |
| ATGL                   | 1.35 ± 0.23 | 1.42 ± 0.21 | 0.8381  |
| HSL                    | 3.04 ± 0.59 | 3.54 ± 0.54 | 0.5515  |
| DGAT1                  | 1.52 ± 0.26 | 1.48 ± 0.23 | 0.9258  |
| SCD1                   | 0.02 ± 0.01 | 0.03 ± 0.01 | 0.5615  |
| PLIN5                  | 3.88 ± 0.65 | 4.63 ± 0.57 | 0.4186  |
| PGC1 $\alpha$          | 6.08 ± 0.55 | 5.15 ± 0.51 | 0.2486  |
| PPAR $\delta$          | 0.88 ± 0.10 | 0.83 ± 0.10 | 0.7169  |
| CPT1 $\beta$           | 4.11 ± 0.67 | 4.49 ± 0.61 | 0.6805  |
| Myotubes               |             |             |         |
| Gene                   | Control     | T2D         | p-value |
| ATGL                   | 0.75 ± 0.17 | 0.70 ± 0.17 | 0.8537  |
| HSL                    | 0.35 ± 0.07 | 0.28 ± 0.06 | 0.4988  |
| DGAT1                  | 0.90 ± 0.17 | 0.77 ± 0.16 | 0.5878  |
| SCD1                   | 1.03 ± 0.37 | 0.88 ± 0.37 | 0.7867  |
| PLIN5                  | -           | -           | -       |
| PGC1 $\alpha$          | 0.05 ± 0.04 | 0.03 ± 0.03 | 0.6978  |
| PPAR $\delta$          | 1.14 ± 0.24 | 0.96 ± 0.23 | 0.6093  |
| CPT1 $\beta$           | 0.04 ± 0.01 | 0.04 ± 0.01 | 0.9021  |

Data are presented as mean ± SEM. N=6 per group. T2D, Type 2 Diabetes; ATGL, adipose triglyceride lipase; HSL, hormone sensitive lipase; DGAT1, diacylglycerol acyl-transferase 1. SCD1, stearoyl-CoA desaturase 1; PLIN5, perilipin 5; PGC-1 $\alpha$ , peroxisome proliferator activated receptor coactivator-1 alpha; PPAR $\delta$ , peroxisome proliferator activated receptor delta; CPT1 $\beta$ , carnitine palmitoyltransferase 1 beta. All data are normalized to an internal control gene, RPL26, ribosomal protein L26. “-“ means that the mRNA expression was not detectable.

SUPPLEMENTARY DATA

**Supplementary Table 2.** Associations of PGC1 $\alpha$  mRNA Expressions with Key Lipid Metabolism Endpoints in Human Skeletal Muscle Tissue and Myotubes.

| mRNA                          | Lipid Metabolism Endpoint            | <i>r</i> | p-value |
|-------------------------------|--------------------------------------|----------|---------|
| PGC1 $\alpha$ (myotubes)      | PA incorporation into TAG (myotubes) | 0.5818   | 0.0604  |
| PGC1 $\alpha$ (myotubes)      | OA incorporation into TAG (myotubes) | 0.6091   | 0.0467  |
| PGC1 $\alpha$ (myotubes)      | DGAT activity (myotubes)             | 0.6573   | 0.0202  |
| PGC1 $\alpha$ (muscle tissue) | PLIN5 mRNA (muscle tissue)           | 0.7000   | 0.0165  |

Data are simple correlations among all 12 participants (Control and T2D). T2D, Type 2 Diabetes; PGC-1 $\alpha$ , peroxisome proliferator activated receptor coactivator-1  $\alpha$ ; DGAT1, diacylglycerol acyl-transferase 1. PLIN5, perilipin 5; All mRNA data are normalized to an internal control gene, RPL26, ribosomal protein L26.

SUPPLEMENTARY DATA

**Supplementary Table 3.** Oligonucleotide sequences for primer/probe sets used for qRT-PCR.

| Gene          | Accession number | Forward primer                  | Probe                           | Reverse primer             |
|---------------|------------------|---------------------------------|---------------------------------|----------------------------|
| ATGL          | NM_020376.2      | CCACGGCGCTGGTCA                 | TTGGCACCAGCCTCACCCAGG           | GGGCCTCTTTAGATACCTCAATGA   |
| HSL           | NM_005357.2      | ACGCTGCATAAGGGATGCTT            | AGTTCACGCCTGCCATCCGGC           | CCTGTCTCGTTGCGTTTGTAGT     |
| DGAT1         | NM_012079        | CGTGAGCTACCCGGACAATC            | ACCTACCGGATCTCTACTACTTCCTCTTCGC | AAAGTTGAGCTCGTAGCACAAGG    |
| SCD1          | NM_005063        | TGGCATTCCAGAATGATGTCTATG        | CGTGACCACCGTGCCCACCA CA         | GGAATTATGAGGATCAGCATGTGT   |
| PLIN5         | NM_001013706.2   | GAGCCATGCTGTGGATGTTGTA          | TGGATCACTTCCTGCCCATGACGG        | CAGTGCCCGAGCTCTTC          |
| PGC1 $\alpha$ | NM_013261.3      | TGCTGAAGAGGGAAAGTGAGCGATTAGTTGA | CATGTAGAATTGGCAGGTGGAA          | AGGTGAAAGTGAATACTGTTGGTTGA |
| PPAR $\delta$ | NM_006238.3      | TCTACAATGCCTACCTGAAAACTTC       | ACATGACCAAAAAGAAGGCCCGCAG       | GGCTTTGCCGGTGAGGAT         |
| CPT1 $\beta$  | NM_152247.1      | CCAGAGCAGCACCCCAAT              | CATCTGCTACAGGGCCAAAGCCACCT      | CTGCAATCATGTAGGAAACTCCATAG |

For all gene expression assays the ribosomal protein L26 gene, RPL26, was used as the internal control. ATGL, adipose triglyceride lipase; HSL, hormone sensitive lipase; DGAT1, diacylglycerol acyl-transferase 1. SCD1, stearoyl-CoA desaturase 1; PLIN5, perilipin 5; PGC-1 $\alpha$ , peroxisome proliferator activated receptor coactivator-1 alpha; PPAR $\delta$ , peroxisome proliferator activated receptor delta; CPT1 $\beta$ , carnitine palmitoyltransferase 1 beta.

SUPPLEMENTARY DATA

**Supplementary Figure 1.** Correlation of the ratio  $^{14}\text{C}$ -palmitate oxidation to  $\text{CO}_2$ :ASMs with (A) the  $\text{VO}_2$ max and (B) the fasting plasma glucose levels in obese individuals with T2D and BMI-matched controls.

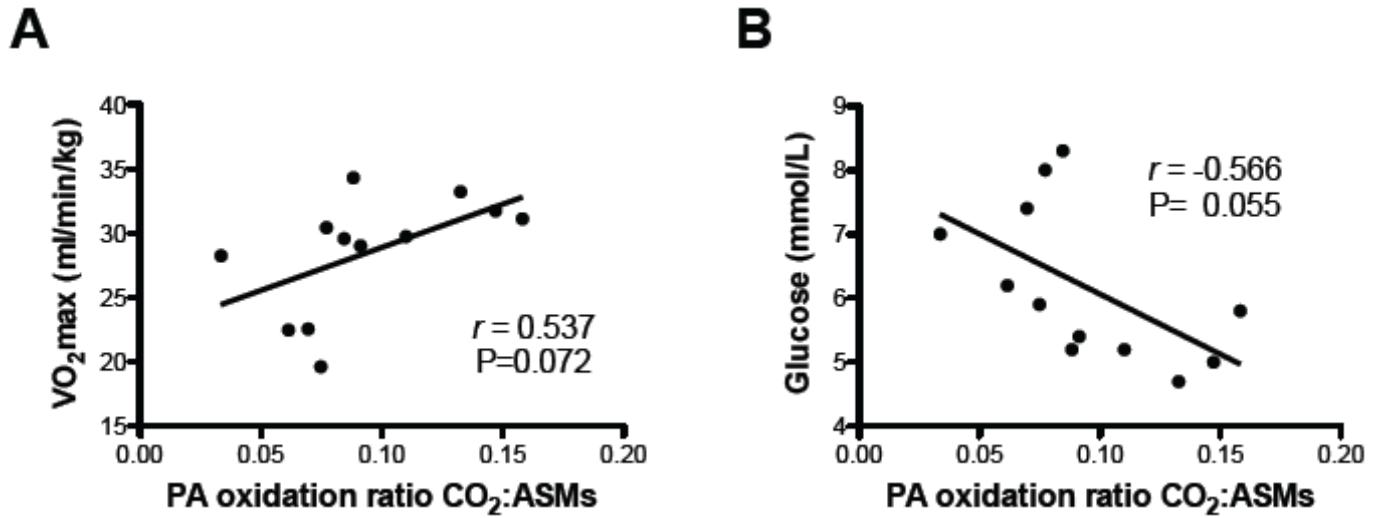

Supplement: NIHMS58538-supplement-Supplementary_data.pdf [file NIHMS58538-supplement-Supplementary_data.pdf]
